# Supplementary material for: Direct aqueous injection of the fluoroacetate anion in potable water for analysis by liquid chromatography tandem mass-spectrometry
Source: Royal Society of Chemistry journal article supplement (doi:10.1039/c8ay02046a), 2018-01-01
Supplement: c8ay02046a1.pdf [file c8ay02046a1.pdf]

Supplementary Data

Direct aqueous injection of the fluoroacetate anion in potable water for analysis by liquid chromatography tandem mass-spectrometry

Emily Parry and Stuart Willison

U.S. Environmental Protection Agency, Office of Research and Development, National Homeland Security Research Center, Threat Consequence Assessment Division  
26 Martin Luther King Dr. W.  
Cincinnati, OH 45268

Table S1: Full gradient program

| TIME | %A | %B  | FLOW RATE (mL/min) | HPLC FLOW                 |
|------|----|-----|--------------------|---------------------------|
| 0    | 95 | 5   | 0.5                | Waste                     |
| 1    | 95 | 5   | 0.5                |                           |
| 11   | 60 | 40  | 0.5                | Instrument (10 to 21 min) |
| 14   | 0  | 100 | 0.5                |                           |
| 19   | 0  | 100 | 0.5                |                           |
| 20   | 95 | 5   | 0.5                |                           |
| 21   | 80 | 20  | 1                  | Waste                     |
| 24   | 0  | 100 | 1                  |                           |
| 30   | 95 | 5   | 1                  |                           |
| 30.5 | 95 | 5   | 0.5                | Re-equilibration          |
| 32   | 95 | 5   | 0.5                |                           |

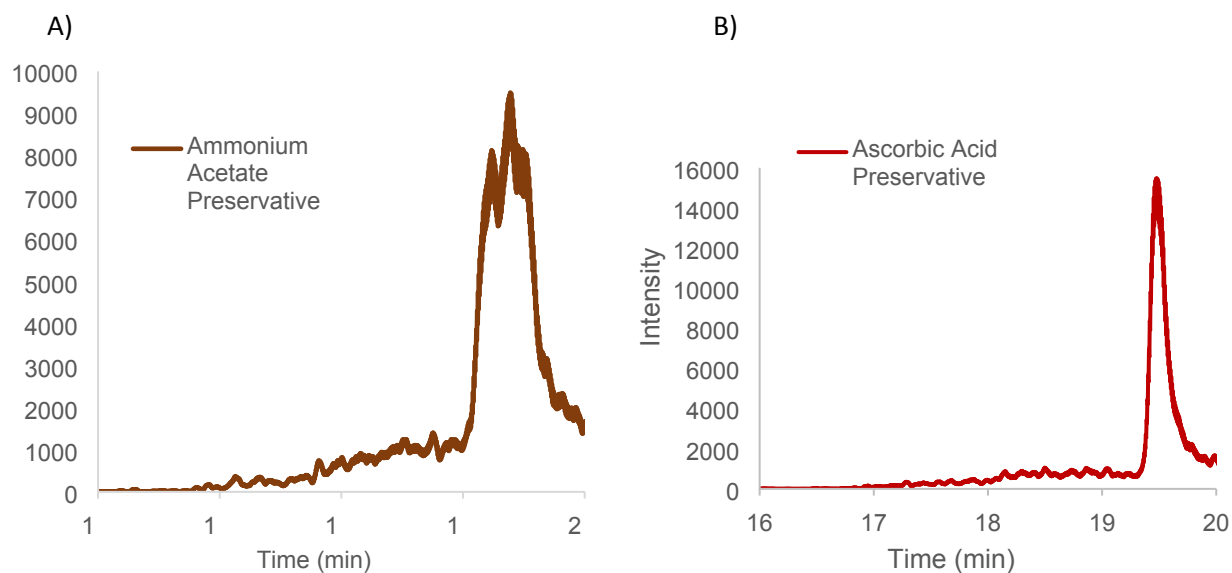

Figure S1: Effect of dechlorination agents on FAA chromatography. A) Extracted Ion Chromatogram (EIC) profile of mass 57.26 of a reagent water sample containing 20 mM ammonium acetate and 64 mg/L sodium omadine. B) EIC 57.26 of reagent water sample containing 250 mg/L ascorbic acid and 64 mg/L sodium omadine.

Table S2: Sample Filtration

| Condition                  |                      | Low Concentration <sup>a</sup> | High Concentration <sup>b</sup> |
|----------------------------|----------------------|--------------------------------|---------------------------------|
|                            | Unfiltered           | Average <sup>c</sup>           | 3.4                             |
| Std. dev.                  |                      | 0.84                           | 2.22                            |
| RSD                        |                      | 25%                            | 6%                              |
| Filtered                   | Average <sup>c</sup> | 3.0                            | 38.5                            |
|                            | Std. dev.            | 0.61                           | 3.33                            |
|                            | RSD                  | 20%                            | 9%                              |
| <b>p-value<sup>d</sup></b> |                      | 0.25                           | 0.29                            |

<sup>a</sup>Low concentration = 4 µg/L

<sup>b</sup>High concentration = 40 µg/L

<sup>c</sup>n = 4

<sup>d</sup>One-tailed t-test,  $\alpha = 0.05$

*Discussion S1. Regression between conductivity and RT*

*Methods:* Retention times (RTs) were segregated by water type from four different water utilities (WS1-4) and averaged across all stability study samples. Conductivity was available for each water type and was natural log normalized for the regression analysis. Figure 2A shows the untransformed data.

| WS                | RT (std. dev) | Conductivity | Ln Conductivity |
|-------------------|---------------|--------------|-----------------|
| WS 1              | 19.44 (0.052) | 348          | 2.541579        |
| WS 2              | 19.44 (0.041) | 287          | 2.4578          |
| WS 3              | 19.14 (0.095) | 1124         | 3.050766        |
| WS 4              | 19.33 (0.086) | 388          | 2.588832        |
| <b>Regression</b> |               |              |                 |
| $\beta$           | Std. Error    | p-value      | R <sup>2</sup>  |
| -1.818            | 0.3122        | 0.0282       | 0.944           |

Table S3: Stability study represents four different water utility sources (WS) and reagent water (RW).

|                                             | Day 0 | Day 1 | Day 3 | Day 7 | Day 14 | Day 21 | Day 28/31 <sup>a</sup> |
|---------------------------------------------|-------|-------|-------|-------|--------|--------|------------------------|
| <b>RW Low<sup>1</sup> Average (µg/L)</b>    | 3.3   | 3.7   | 3.9   | 3.7   | 3.7    | 3.5    | 3.5                    |
| % RSD                                       | 5     | 9     | 6     | 8     | 11     | 5      | 12                     |
| % of day 0                                  | ref   | 112   | 120   | 114   | 111    | 107    | 108                    |
| <b>RW High Average (µg/L)</b>               | 44.9  | 39.0  | 43.4  | 39.0  | 40.0   | 41.9   | 38.2                   |
| % RSD                                       | 8     | 3     | 6     | 13    | 8      | 4      | 13                     |
| % of day 0                                  | ref   | 87    | 97    | 87    | 89     | 93     | 85                     |
| <b>WS 1 Low<sup>1</sup> Average (µg/L)</b>  | 3.9   | 3.9   | 3.3   | 4.3   | 3.7    | 3.5    | 3.5                    |
| % RSD                                       | 13    | 8     | 10    | 5     | 9      | 7      | 8                      |
| % of day 0                                  | ref   | 101   | 86    | 110   | 94     | 89     | 91                     |
| <b>WS 1 High<sup>1</sup> Average (µg/L)</b> | 41.1  | 39.5  | 36.9  | 39.0  | 41.8   | 38.0   | 44.2                   |
| % RSD                                       | 4     | 5     | 7     | 2     | 3      | 2      | 11                     |
| % of day 0                                  | ref   | 96    | 90    | 95    | 102    | 92     | 107                    |
| <b>WS 2 Low<sup>1</sup> Average (µg/L)</b>  | 4.0   | 3.8   | 3.7   | 3.8   | 3.2    | 3.3    | 3.0                    |
| % RSD                                       | 15    | 7     | 2     | 10    | 15     | 10     | 26                     |
| % of day 0                                  | ref   | 94    | 92    | 95    | 80     | 81     | 76                     |
| <b>WS 2 High<sup>1</sup> Average (µg/L)</b> | 41.5  | 39.2  | 37.6  | 40.2  | 38.3   | 36.8   | 45.3                   |
| % RSD                                       | 2     | 4     | 1     | 4     | 1      | 4      | 8                      |
| % of day 0                                  | ref   | 94    | 91    | 97    | 92     | 89     | 109                    |
| <b>WS 3 Low Average (µg/L)</b>              | 4.0   | 3.6   | 2.5   | 3.1   | 3.0    | 3.1    | 2.4                    |
| % RSD                                       | 5     | 13    | 13    | 6     | 33     | 14     | 15                     |
| % of day 0                                  | ref   | 89    | 63    | 76    | 74     | 78     | 59                     |
| <b>WS 3 High Average (µg/L)</b>             | 40.3  | 38.5  | 36.2  | 40.0  | 38.4   | 44.4   | 44.2                   |
| % RSD                                       | 11    | 3     | 3     | 9     | 8      | 9      | 3                      |
| % of day 0                                  | ref   | 96    | 90    | 99    | 95     | 110    | 110                    |
| <b>WS 4 Low Average (µg/L)</b>              | 4.00  | 3.99  | 3.94  | 4.02  | 3.97   | 3.52   | 3.58                   |
| % RSD                                       | 1     | 10    | 21    | 11    | 20     | 9      | 29                     |
| % of day 0                                  | ref   | 100   | 99    | 101   | 99     | 88     | 90                     |
| <b>WS 4 High Average (µg/L)</b>             | 40.6  | 37.3  | 36.6  | 41.3  | 37.4   | 39.8   | 37.4                   |
| % RSD                                       | 3%    | 2%    | 5%    | 6%    | 3%     | 2%     | 5%                     |
| % of day 0                                  | ref   | 92%   | 90%   | 102%  | 92%    | 98%    | 92%                    |

<sup>a</sup> Final measurement was conducted after 31 days

All values are calculated from three replicates.

RSD = relative standard deviation.

Ref = Day 0 was the comparison value, so recovery is considered 100%.

Table S4: Calibration curve concentrations for fluoroacetate (FAA) and fluoroacetate internal standard (FAA\_L).

| Calibration Solution Name | Source Solution | Source Solution Volume (µL) | 2.5 g/L Ascorbic Acid Solution Volume (µL) | 3.2 g/L Sodium Omadine Solution (µL) | 2.5 mg/L FAA_L Standard Solution (µL) | Final Volume of Solution (mL) | Nominal Calibration Solution Conc. (µg/L) |
|---------------------------|-----------------|-----------------------------|--------------------------------------------|--------------------------------------|---------------------------------------|-------------------------------|-------------------------------------------|
| CAL 1                     | 0.05 mg/L FAA   | 20                          | 100                                        | 20                                   | 10                                    | 1                             | 1                                         |
| CAL 2                     | 0.05 mg/L FAA   | 40                          | 100                                        | 20                                   | 10                                    | 1                             | 2                                         |
| CAL 3                     | 0.05 mg/L FAA   | 80                          | 100                                        | 20                                   | 10                                    | 1                             | 4                                         |
| CAL 4                     | 0.05 mg/L FAA   | 160                         | 100                                        | 20                                   | 10                                    | 1                             | 8                                         |
| CAL 5                     | 1 mg/L FAA      | 12                          | 100                                        | 20                                   | 10                                    | 1                             | 12                                        |
| CAL 6                     | 1 mg/L FAA      | 20                          | 100                                        | 20                                   | 10                                    | 1                             | 20                                        |
| CAL 7                     | 1 mg/L FAA      | 40                          | 100                                        | 20                                   | 10                                    | 1                             | 40                                        |
| CAL 8                     | 1 mg/L FAA      | 60                          | 100                                        | 20                                   | 10                                    | 1                             | 60                                        |
| CAL 9                     | 1 mg/L FAA      | 100                         | 100                                        | 20                                   | 10                                    | 1                             | 100                                       |

FAA detection limit was determined from seven replicates of samples at the CAL 3 level, with batches prepared over three days. The DL was calculated to be 0.4 µg/L, using a t value of 3.143 for n=7. The DL calculation is presented in Table S5. The MRL was determined from seven replicates of samples at the CAL 2 level. The HR<sub>PIR</sub> was determined to be 0.65 µg/L. Based on this result, the lower PIR was calculated to be 57.0% and the upper PIR to be 122%. These values meet both the upper and lower PIR limit requirements of ≤ 150% for the upper PIR and ≥ 50% for the lower PIR. The MRL confirmation is shown in Table S6. Representative chromatograms of both 1 µg/L and 2 µg/L, the MRL, are shown in Figure S2.

Table S5: DL Calculation

| Sample         | Nominal Concentration (µg/L) | Determined Concentration (µg/L) |
|----------------|------------------------------|---------------------------------|
| DL CAL 3 Day 1 |                              | 4.2                             |
| DL CAL 3 Day 2 |                              | 4.1                             |
| DL CAL 3 Day 2 |                              | 3.8                             |
| DL CAL 3 Day 2 | 4                            | 4.2                             |
| DL CAL 3 Day 3 |                              | 4.0                             |
| DL CAL 3 Day 3 |                              | 4.1                             |
| DL CAL 3 Day 3 |                              | 4.0                             |
|                | Average                      | 4.0                             |
|                | s                            | 0.13                            |
|                | Calculated DL                | 0.4                             |

**Table S6: Half-Range Prediction Interval Calculation**

| Sample Name | Nominal Concentration Level ( $\mu\text{g/L}$ ) | Determined Concentration ( $\mu\text{g/L}$ ) |
|-------------|-------------------------------------------------|----------------------------------------------|
| DL CAL 2_1  | 2                                               | 1.7                                          |
| DL CAL 2_2  |                                                 | 2.0                                          |
| DL CAL 2_3  |                                                 | 2.0                                          |
| DL CAL 2_4  |                                                 | 1.7                                          |
| DL CAL 2_5  |                                                 | 1.6                                          |
| DL CAL 2_6  |                                                 | 1.9                                          |
| DL CAL 2_7  |                                                 | 1.6                                          |
|             | <b>Average</b>                                  | 1.8                                          |
|             | <b>s</b>                                        | 0.2                                          |
|             | <b>HR<sub>PIR</sub></b>                         | 0.65                                         |

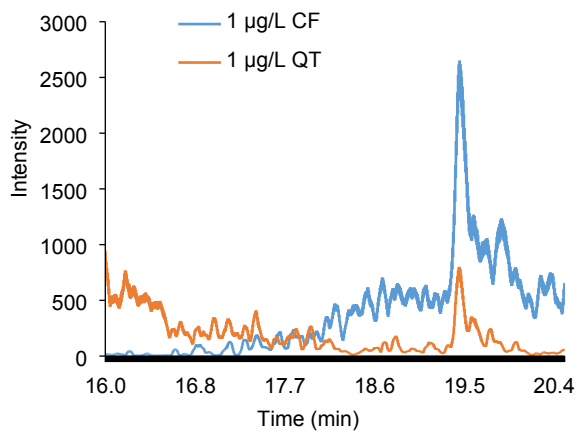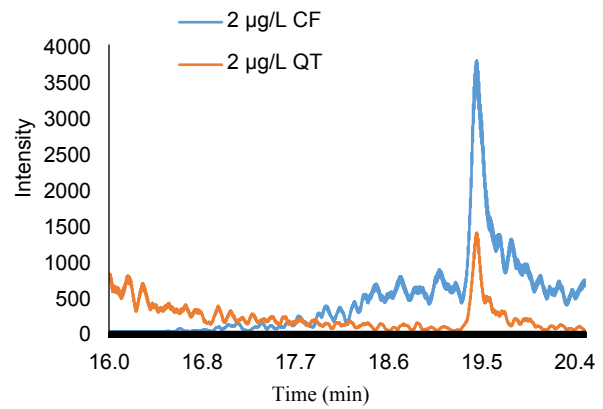

**Figure S2: Low Standard Chromatograms for FAA**
